# Supplementary material
Source: publisher figshare collection journal article supplement (https://wiley.figshare.com/articles/dataset/_/3567174)
Supplement: Supplementary file 2 [file 1 › appendix-B.htm]

Ecological Archives M080-019-A2


### *Ecological Archives* M080-019-A2

### **Ellen D. Currano, Conrad C. Labandeira, and Peter Wilf. 2010. Fossil insect folivory tracks paleoclimate for six million years. *Ecological Monographs* 80:547–567.**

Appendix B. Woody dicot species and morphotypes in the Bighorn Basin floras.

> View / download PDF.

---


[Back to M080-019]
